# Supplementary material
Source: PubMed Central journal article supplement (PMC3220510)
Supplement: supp_M111.305235_jbc.M111.305235-1.pdf [file supp_M111.305235_jbc.M111.305235-1.pdf]

**Kinetically Controlled Drug Resistance:  
how *Penicillium brevicompactum* survives mycophenolic acid**  
Xin E. Sun, Bjarne Gram Hansen, and Lizbeth Hedstrom

**SUPPLEMENTAL DATA**

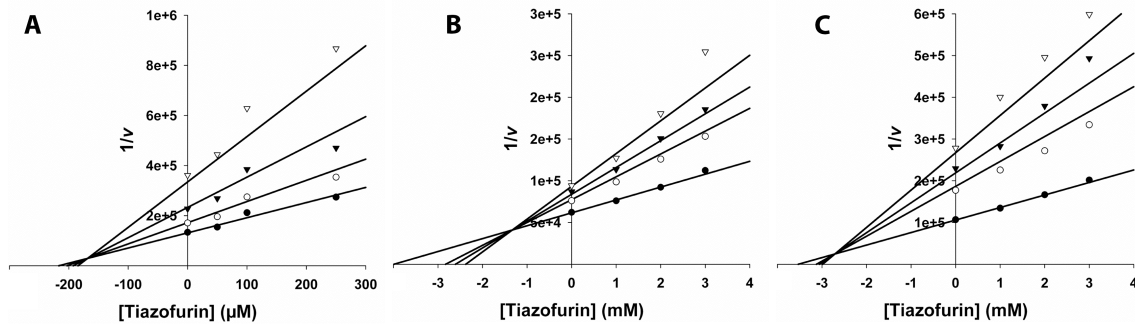

**FIGURE S1.** Multiple inhibitor experiments. The interaction of tiazofurin and ADP is used to probe the equilibrium between  $E\text{-XMP}^*_{\text{open}}$  and  $E\text{-XMP}^*_{\text{closed}}$  as described in Methods. The values of the interaction constant  $\alpha$  were determined by the fit to equation 6. The Dixon plots ( $1/v$  vs. tiazofurin at increasing concentrations of ADP) are shown for inspection only. A. *AnImdA*; B. *PbIMPDH-A*; C. *PbIMPDH-B*. The concentrations of tiazofurin used are as follows: *AnImdA*: 0, 50, 100, 250  $\mu\text{M}$ ; *PbIMPDH-A* and *PbIMPDH-B*: 0, 1, 2, 3 mM. The concentrations of ADP used for *AnImdA* are: 0 (closed circles), 1 (open circles), 2.5 (closed triangles), 5 (open triangles) mM. The concentrations of ADP used for *PbIMPDH-A* and *PbIMPDH-B* are: 0 (closed circles), 2.5 (open circles), 3.5 (closed triangles), 5 mM (open triangles). The inhibition constants and  $\alpha$  value for each enzyme are listed in Table 5.2. The inhibitors are slightly synergistic for *AnImdA* and *PbIMPDH-B* and more synergistic for *PbIMPDH-A*.

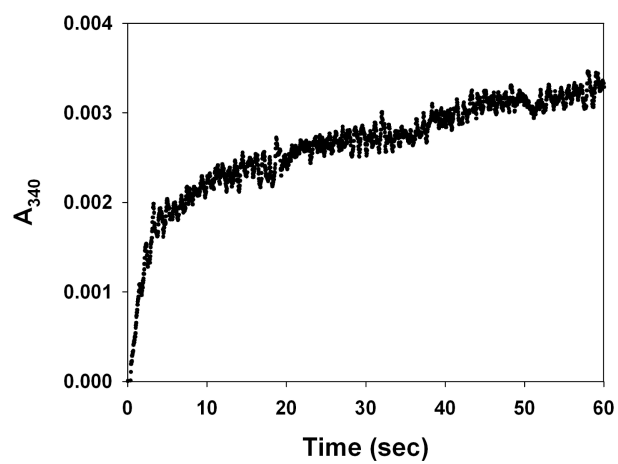

**FIGURE S2.** Burst of NADH production in Arg429Ala mutant of *PbIMPDH-B*.
